# Supplementary material for: Relationships between Expenditure of Regional Governments and Suicide Mortalities Caused by Six Major Motives in Japan
Source: MDPI journal article supplement (doi:10.3390/ijerph19010084), 2021-12-22
Supplement: s1 [file s1]

## Supplemental Data List

**Supplementary Table S1:** Feature of regional governmental expenditures. (page 2).

**Supplementary Table S2:** Impacts of financial expenditure ratio (Model-1) and per Capita (Model-2,3,4) of divisions and subdivisions of prefectures and municipalities on suicide mortality of male plus female caused by major six motives. (page 3).

**Supplementary Table S3:** Impacts of financial expenditure ratio (Model-1) and per Capita (Model-2,3,4) of divisions and subdivisions of prefectures and municipalities on suicide mortality of male caused by major six motives. (page 4).

**Supplementary Table S4:** Impacts of financial expenditure ratio (Model-1) and per Capita (Model-2,3,4) of divisions and subdivisions of prefectures and municipalities on suicide mortality of female caused by major six motives. (page 5).

**Supplementary Table S1:****Feature of regional governmental expenditures**

| <b>Division/Subdivision</b> | <b>Subject/Content</b>                                                                                                                                                                                                                                                                             |
|-----------------------------|----------------------------------------------------------------------------------------------------------------------------------------------------------------------------------------------------------------------------------------------------------------------------------------------------|
| <b>public health</b>        | public health expenditure of prefecture/municipality comprises support for or the improvement of medical care, mental health and collecting/disposing of general waste, to maintain and improve public health and the regional environment.                                                        |
| <b>public works</b>         | public works expenditure of prefecture/municipality comprises constructing new public facilities and the improvement of existing ones, including roads, bridges, parks and sewers.                                                                                                                 |
| <b>police</b>               | police expenditure comprises salaries of police officers, police construction, projects and traffic signals, to carry out police administration to prevent crime, ensure traffic safety, maintain the safety and order of regional communities, and protect the lives and property of individuals. |
| <b>Ambulance/fire</b>       | Ambulance/fire services expenditure of municipality comprises salaries of fire-station officers, station construction and fire trucks and ambulances, to protect individuals from disasters for emergency cases and the sudden deterioration of health.                                            |
| <b>Education</b>            | Education expenditure of prefecture/municipality comprises salaries of educational officers, constructing new educational facilities and improving existing educational facilities.                                                                                                                |
| <b>Social</b>               | facilities including public halls, libraries and museums                                                                                                                                                                                                                                           |
| Elementary school           | 6~12 years old                                                                                                                                                                                                                                                                                     |
| Junior high school          | 12~15 years old                                                                                                                                                                                                                                                                                    |
| Senior high school          | 15~18 years old                                                                                                                                                                                                                                                                                    |
| Special school              | for the education of special needs individuals: prefecture: 3~18 years old                                                                                                                                                                                                                         |
| Kindergarten school         | 3~6 years old                                                                                                                                                                                                                                                                                      |
| <b>Welfare</b>              | Welfare expenditure of prefecture/municipality comprises mainly social assistance expenditure.                                                                                                                                                                                                     |
| Social                      | Various support for individuals with disabilities and welfare assistance for unclassifiable subjects.                                                                                                                                                                                              |
| Elderly                     | Financial support contributions for health insurance of elderly and long-term care insurance (for individuals 65 years old and over)                                                                                                                                                               |
| Children                    | Support for caregiver (excluding livelihood welfare recipients) raising child (up to 15 years old): allowance, school lunches and medical expenses subsidy (for individuals younger than 17 years old)                                                                                             |
| Livelihood                  | Support for livelihood-protection individuals                                                                                                                                                                                                                                                      |

**Supplementary Table S2:**  
Impacts of financial expenditure ratio (Model-1) and per Capita (Model-2,3,4) of divisions and subdivisions of prefectures and municipalities on suicide mortality of male plus female caused by major six motives.

| Factors                       | Family |      |       |                                | Health |      |       |                               | Economy |      |       |                               | Employment |      |       |                                | Romance |      |       |                               | School |      |       |         |
|-------------------------------|--------|------|-------|--------------------------------|--------|------|-------|-------------------------------|---------|------|-------|-------------------------------|------------|------|-------|--------------------------------|---------|------|-------|-------------------------------|--------|------|-------|---------|
|                               | β      | SE   | T     | p                              | β      | SE   | T     | p                             | β       | SE   | T     | p                             | β          | SE   | T     | p                              | β       | SE   | T     | p                             | β      | SE   | T     | p       |
| Model-1                       |        |      |       |                                |        |      |       |                               |         |      |       |                               |            |      |       |                                |         |      |       |                               |        |      |       |         |
| public health                 | -0.47  | 0.10 | -3.70 | 0.001 **                       | -0.48  | 0.29 | -4.26 | 0.000 **                      | -0.44   | 0.16 | -4.12 | 0.000 **                      | -0.35      | 0.07 | -2.68 | 0.011 *                        | -0.23   | 0.03 | -2.09 | 0.043 *                       | -0.12  | 0.02 | -1.06 | 0.293   |
| public works                  | 0.45   | 0.04 | 3.02  | 0.004 **                       | 0.47   | 0.13 | 3.10  | 0.003 **                      | 0.67    | 0.08 | 4.18  | 0.000 **                      | 0.30       | 0.03 | 1.86  | 0.070                          | 0.43    | 0.02 | 2.11  | 0.041 *                       | 0.03   | 0.01 | 0.20  | 0.846   |
| police                        | 0.03   | 0.01 | 0.27  | 0.792                          | -0.28  | 0.02 | -3.45 | 0.001 **                      | -0.34   | 0.02 | -3.36 | 0.002 *                       | -0.07      | 0.01 | -0.63 | 0.529                          | -0.28   | 0.00 | -2.72 | 0.010 **                      | -0.04  | 0.00 | -0.45 | 0.658   |
| Ambulance/fire                | -0.40  | 0.01 | -1.18 | 0.245                          | -0.04  | 0.02 | -0.10 | 0.919                         | 0.44    | 0.02 | 1.00  | 0.322                         | -0.01      | 0.00 | -0.03 | 0.977                          | -0.03   | 0.00 | -0.07 | 0.942                         | 0.32   | 0.00 | 0.76  | 0.452   |
| Welfare                       | -0.11  | 0.01 | -2.10 | 0.042 *                        | 0.01   | 0.06 | 0.17  | 0.863                         | -0.19   | 0.06 | -1.56 | 0.127                         | 0.01       | 0.02 | 0.11  | 0.913                          | 0.02    | 0.01 | 0.31  | 0.755                         | 0.13   | 0.00 | 1.73  | 0.091   |
| Education                     | 0.05   | 0.05 | 1.00  | 0.325                          | 0.01   | 0.14 | 0.29  | 0.773                         | 0.00    | 0.08 | -0.10 | 0.922                         | 0.05       | 0.03 | 0.93  | 0.356                          | 0.01    | 0.01 | 0.22  | 0.828                         | 0.05   | 0.01 | 1.44  | 0.156   |
| (VC=0.254, X²=295.08, p<0.01) |        |      |       | (VC=3.939, X²=717.00, p<0.01)  |        |      |       | (VC=0.465, X²=249.47, p<0.01) |         |      |       | (VC=0.086, X²=247.75, p<0.01) |            |      |       | (VC=0.013, X²=145.99, p<0.01)  |         |      |       | (VC=0.004, X²=134.89, p<0.01) |        |      |       |         |
| Model-2                       |        |      |       |                                |        |      |       |                               |         |      |       |                               |            |      |       |                                |         |      |       |                               |        |      |       |         |
| public health                 | 0.10   | 0.02 | 3.03  | 0.004 **                       | 0.00   | 0.06 | -0.05 | 0.963                         | -0.09   | 0.04 | -2.70 | 0.010 *                       | 0.02       | 0.01 | 0.51  | 0.616                          | -0.03   | 0.01 | -0.63 | 0.531                         | 0.00   | 0.00 | -0.11 | 0.912   |
| public works                  | 0.14   | 0.02 | 1.72  | 0.093                          | 0.05   | 0.12 | 0.34  | 0.732                         | -0.04   | 0.12 | -0.20 | 0.843                         | 0.02       | 0.03 | 0.10  | 0.920                          | -0.09   | 0.01 | -1.07 | 0.289                         | -0.13  | 0.00 | -1.60 | 0.116   |
| police                        | -0.43  | 0.53 | -1.83 | 0.074                          | -0.22  | 1.40 | -1.10 | 0.280                         | 0.50    | 0.89 | 2.36  | 0.023 *                       | -0.56      | 0.25 | -3.11 | 0.003 **                       | -0.29   | 0.16 | -1.21 | 0.235                         | -0.63  | 0.10 | -2.58 | 0.014 * |
| Ambulance/fire                | -0.54  | 0.16 | -5.46 | 0.000 **                       | -0.53  | 0.51 | -5.22 | 0.000 **                      | -0.82   | 0.35 | -7.01 | 0.000 **                      | -0.27      | 0.12 | -2.24 | 0.030 *                        | -0.39   | 0.06 | -3.12 | 0.003 **                      | 0.00   | 0.03 | 0.03  | 0.979   |
| Welfare                       | -0.10  | 0.01 | -1.46 | 0.151                          | -0.15  | 0.08 | -1.03 | 0.311                         | -0.44   | 0.07 | -2.17 | 0.036 *                       | -0.10      | 0.01 | -1.48 | 0.146                          | -0.14   | 0.01 | -1.29 | 0.203                         | 0.02   | 0.00 | 0.19  | 0.848   |
| Education                     | -0.74  | 0.11 | -3.27 | 0.002 **                       | -0.87  | 0.29 | -4.51 | 0.000 **                      | -0.75   | 0.16 | -4.30 | 0.000 **                      | -0.44      | 0.06 | -2.06 | 0.046 *                        | -0.53   | 0.03 | -2.92 | 0.006 **                      | -0.10  | 0.02 | -0.47 | 0.640   |
| (VC=0.280, X²=311.69, p<0.01) |        |      |       | (VC=3.872, X²=527.56, p<0.01)  |        |      |       | (VC=0.412, X²=164.48, p<0.01) |         |      |       | (VC=0.113, X²=296.60, p<0.01) |            |      |       | (VC=0.012, X²=134.14, p<0.01)  |         |      |       | (VC=0.006, X²=159.61, p<0.01) |        |      |       |         |
| Model-3                       |        |      |       |                                |        |      |       |                               |         |      |       |                               |            |      |       |                                |         |      |       |                               |        |      |       |         |
| public health                 | 0.10   | 0.02 | 2.85  | 0.007 **                       | 0.00   | 0.06 | -0.11 | 0.910                         | -0.09   | 0.04 | -2.25 | 0.031 *                       | 0.02       | 0.02 | 0.53  | 0.601                          | -0.03   | 0.01 | -0.72 | 0.475                         | -0.02  | 0.01 | -0.28 | 0.778   |
| public works                  | 0.11   | 0.02 | 1.69  | 0.100                          | 0.00   | 0.10 | 0.02  | 0.986                         | -0.11   | 0.10 | -0.57 | 0.574                         | -0.03      | 0.02 | -0.20 | 0.843                          | -0.12   | 0.01 | -1.56 | 0.126                         | -0.14  | 0.00 | -1.57 | 0.125   |
| police                        | -0.38  | 0.53 | -1.61 | 0.116                          | -0.23  | 1.34 | -1.23 | 0.228                         | 0.46    | 0.82 | 2.35  | 0.024 *                       | -0.55      | 0.25 | -3.01 | 0.005 **                       | -0.26   | 0.17 | -1.01 | 0.318                         | 0.09   | 0.03 | 1.06  | 0.296   |
| Ambulance/fire                | -0.54  | 0.16 | -5.62 | 0.000 *                        | -0.52  | 0.46 | -5.69 | 0.000 **                      | -0.79   | 0.29 | -8.10 | 0.000 **                      | -0.23      | 0.14 | -1.65 | 0.108                          | -0.33   | 0.06 | -2.71 | 0.010 *                       | 0.04   | 0.03 | 0.37  | 0.714   |
| Welfare                       | -0.08  | 0.01 | -1.38 | 0.176                          | -0.11  | 0.06 | -0.95 | 0.350                         | -0.37   | 0.06 | -2.19 | 0.035 *                       | -0.06      | 0.01 | -1.18 | 0.244                          | -0.11   | 0.00 | -1.33 | 0.190                         | 0.01   | 0.00 | 0.11  | 0.910   |
| (Education)                   |        |      |       |                                |        |      |       |                               |         |      |       |                               |            |      |       |                                |         |      |       |                               |        |      |       |         |
| Social                        | -0.05  | 0.20 | -0.64 | 0.526                          | -0.16  | 0.49 | -2.60 | 0.013 *                       | -0.15   | 0.37 | -1.98 | 0.055                         | -0.10      | 0.09 | -1.88 | 0.069                          | -0.18   | 0.07 | -2.16 | 0.037 *                       | -0.13  | 0.04 | -1.37 | 0.180   |
| Elementary                    | -0.19  | 0.01 | -1.30 | 0.201                          | -0.28  | 0.02 | -2.46 | 0.019 *                       | -0.24   | 0.02 | -1.99 | 0.055                         | -0.01      | 0.01 | -0.08 | 0.936                          | -0.17   | 0.00 | -1.50 | 0.143                         | 0.06   | 0.00 | 0.50  | 0.618   |
| Junior                        | 0.01   | 0.01 | 0.07  | 0.946                          | 0.01   | 0.04 | 0.08  | 0.936                         | -0.07   | 0.02 | -0.56 | 0.579                         | -0.05      | 0.01 | -0.35 | 0.730                          | 0.08    | 0.00 | 0.49  | 0.625                         | -0.01  | 0.00 | -0.05 | 0.960   |
| High                          | -0.08  | 0.01 | -0.83 | 0.409                          | -0.01  | 0.02 | -0.07 | 0.943                         | 0.07    | 0.01 | 0.85  | 0.402                         | 0.00       | 0.00 | 0.00  | 0.997                          | -0.05   | 0.00 | -0.46 | 0.645                         | -0.02  | 0.00 | -0.23 | 0.821   |
| Special                       | 0.03   | 0.00 | 0.27  | 0.789                          | 0.16   | 0.00 | 1.86  | 0.072                         | 0.26    | 0.00 | 2.84  | 0.007 **                      | 0.17       | 0.00 | 1.49  | 0.146                          | 0.12    | 0.00 | 1.11  | 0.273                         | -0.09  | 0.00 | -1.03 | 0.309   |
| Kindergarten                  | -0.39  | 0.01 | -3.64 | 0.001 **                       | -0.50  | 0.02 | -3.58 | 0.001 **                      | -0.59   | 0.01 | -5.97 | 0.000 **                      | -0.35      | 0.00 | -3.09 | 0.004 **                       | -0.31   | 0.00 | -2.45 | 0.019 *                       | -0.20  | 0.00 | -1.73 | 0.093   |
| (VC=0.270, X²=309.08, p<0.01) |        |      |       | (VC=3.955, X²=593.532, p<0.01) |        |      |       | (VC=0.396, X²=179.70, p<0.01) |         |      |       | (VC=0.101, X²=281.44, p<0.01) |            |      |       | (VC=0.010, X²=122.367, p<0.01) |         |      |       | (VC=0.004, X²=134.52, p<0.01) |        |      |       |         |
| Model-4                       |        |      |       |                                |        |      |       |                               |         |      |       |                               |            |      |       |                                |         |      |       |                               |        |      |       |         |
| public health                 | 0.11   | 0.02 | 3.02  | 0.005 **                       | 0.03   | 0.07 | 0.68  | 0.498                         | -0.06   | 0.05 | -1.32 | 0.196                         | 0.03       | 0.02 | 0.50  | 0.617                          | -0.02   | 0.01 | -0.28 | 0.780                         | -0.02  | 0.00 | -0.45 | 0.658   |
| public works                  | 0.12   | 0.02 | 1.97  | 0.057                          | 0.00   | 0.05 | -0.03 | 0.980                         | -0.13   | 0.04 | -1.83 | 0.077                         | -0.02      | 0.01 | -0.32 | 0.748                          | -0.13   | 0.01 | -1.48 | 0.148                         | -0.15  | 0.00 | -1.74 | 0.091   |
| police                        | -0.44  | 0.60 | -1.68 | 0.102                          | -0.26  | 1.09 | -1.67 | 0.105                         | 0.30    | 0.81 | 1.58  | 0.124                         | -0.08      | 0.18 | -0.57 | 0.570                          | -0.32   | 0.16 | -1.31 | 0.200                         | 0.22   | 0.06 | 1.50  | 0.142   |
| Ambulance/fire                | -0.34  | 0.18 | -3.04 | 0.005 **                       | -0.23  | 0.39 | -3.02 | 0.005 **                      | -0.48   | 0.23 | -6.31 | 0.000 **                      | -0.05      | 0.11 | -0.44 | 0.663                          | -0.16   | 0.06 | -1.32 | 0.197                         | 0.07   | 0.03 | 0.65  | 0.520   |
| (Education)                   |        |      |       |                                |        |      |       |                               |         |      |       |                               |            |      |       |                                |         |      |       |                               |        |      |       |         |
| Social                        | 0.05   | 0.16 | 0.79  | 0.437                          | -0.01  | 0.47 | -0.21 | 0.832                         | 0.02    | 0.30 | 0.38  | 0.704                         | -0.03      | 0.13 | -0.41 | 0.682                          | -0.09   | 0.07 | -1.03 | 0.312                         | -0.13  | 0.03 | -1.71 | 0.097   |
| Elementary                    | -0.13  | 0.01 | -0.89 | 0.380                          | -0.16  | 0.02 | -2.20 | 0.035                         | -0.12   | 0.01 | -1.10 | 0.277                         | 0.06       | 0.00 | 0.55  | 0.585                          | -0.08   | 0.00 | -0.65 | 0.519                         | 0.07   | 0.00 | 0.69  | 0.497   |
| Junior                        | 0.03   | 0.01 | 0.22  | 0.830                          | 0.09   | 0.02 | 1.06  | 0.296                         | -0.09   | 0.02 | -0.95 | 0.347                         | -0.04      | 0.01 | -0.34 | 0.734                          | 0.12    | 0.00 | 0.87  | 0.393                         | -0.01  | 0.00 | -0.10 | 0.919   |
| High                          | -0.06  | 0.01 | -0.66 | 0.513                          | 0.08   | 0.01 | 1.25  | 0.219                         | 0.11    | 0.01 | 1.85  | 0.073                         | -0.02      | 0.00 | -0.26 | 0.798                          | 0.00    | 0.00 | -0.02 | 0.986                         | -0.04  | 0.00 | -0.43 | 0.671   |
| Special                       | 0.00   | 0.00 | -0.02 | 0.982                          | 0.08   | 0.00 | 1.61  | 0.118                         | 0.20    | 0.00 | 2.85  | 0.007 **                      | 0.10       | 0.00 | 1.39  | 0.173                          | 0.07    | 0.00 | 0.86  | 0.396                         | -0.10  | 0.00 | -1.18 | 0.245   |
| Kindergarten                  | -0.13  | 0.01 | -1.24 | 0.223                          | -0.04  | 0.01 | -0.51 | 0.614                         | -0.05   | 0.01 | -0.76 | 0.453                         | -0.18      | 0.00 | -1.60 | 0.119                          | 0.02    | 0.00 | 0.15  | 0.880                         | -0.19  | 0.00 | -1.33 | 0.192   |
| (Welfare)                     |        |      |       |                                |        |      |       |                               |         |      |       |                               |            |      |       |                                |         |      |       |                               |        |      |       |         |
| Social                        | -0.30  | 0.11 | -2.38 | 0.023 *                        | -0.36  | 0.19 | -5.27 | 0.000 **                      | -0.39   | 0.13 | -4.76 | 0.000 **                      | -0.26      | 0.06 | -2.48 | 0.018 *                        | -0.11   | 0.03 | -0.96 | 0.346                         | -0.03  | 0.02 | -0.24 | 0.810   |
| Elderly                       | 0.35   | 0.05 | 2.78  | 0.009 **                       | 0.23   | 0.11 | 2.69  | 0.011 *                       | 0.38    | 0.07 | 3.86  | 0.000 **                      | 0.19       | 0.04 | 1.35  | 0.187                          | 0.20    | 0.02 | 1.22  | 0.231                         | 0.02   | 0.01 | 0.10  | 0.922   |
| Children                      | 0.00   | 0.01 | 0.00  | 0.998                          | -0.26  | 0.02 | -4.29 | 0.000 **                      | -0.40   | 0.02 | -5.46 | 0.000 **                      | -0.03      | 0.01 | -0.33 | 0.746                          | -0.30   | 0.00 | -3.12 | 0.004 *                       | 0.00   | 0.00 | 0.03  | 0.977   |
| Livelihood                    | 0.01   | 0.01 | 0.09  | 0.930                          | -0.07  | 0.02 | -0.84 | 0.408                         | 0.10    | 0.02 | 0.86  | 0.395                         | 0.00       | 0.01 | -0.03 | 0.978                          | -0.03   | 0.00 | -0.22 | 0.825                         | 0.06   | 0.00 | 0.31  | 0.756   |
| (VC=0.256, X²=313.33, p<0.01) |        |      |       | (VC=4.462, X²=866.14, p<0.01)  |        |      |       | (VC=0.621, X²=342.33, p<0.01) |         |      |       | (VC=0.092, X²=266.89, p<0.01) |            |      |       | (VC=0.009, X²=123.03, p<0.01)  |         |      |       | (VC=0.002, X²=95.86, p<0.01)  |        |      |       |         |

**Supplementary Table S3:**  
Impacts of financial expenditure ratio (Model-1) and per Capita (Model-2,3,4) of divisions and subdivisions of prefectures and municipalities on suicide mortality of male caused by major six motives.

| Factors                       | Family |      |       |          | Health                        |      |       |          | Economy |                               |       |          | Employment |      |                               |         | Romance |      |       |                               | School |      |       |          |                               |  |  |  |  |
|-------------------------------|--------|------|-------|----------|-------------------------------|------|-------|----------|---------|-------------------------------|-------|----------|------------|------|-------------------------------|---------|---------|------|-------|-------------------------------|--------|------|-------|----------|-------------------------------|--|--|--|--|
|                               | β      | SE   | T     | p        | β                             | SE   | T     | p        | β       | SE                            | T     | p        | β          | SE   | T                             | p       | β       | SE   | T     | p                             | β      | SE   | T     | p        |                               |  |  |  |  |
| Model-1                       |        |      |       |          |                               |      |       |          |         |                               |       |          |            |      |                               |         |         |      |       |                               |        |      |       |          |                               |  |  |  |  |
| public health                 | -0.37  | 0.14 | -3.25 | 0.002 ** | -0.38                         | 0.43 | -2.97 | 0.005 ** | -0.42   | 0.31                          | -3.85 | 0.000 ** | -0.29      | 0.12 | -2.37                         | 0.022 * | -0.04   | 0.04 | -0.29 | 0.770                         | -0.26  | 0.02 | -3.04 | 0.004 *  |                               |  |  |  |  |
| public works                  | 0.49   | 0.06 | 3.46  | 0.001 ** | 0.38                          | 0.20 | 2.20  | 0.034 *  | 0.70    | 0.16                          | 4.26  | 0.000 ** | 0.21       | 0.05 | 1.27                          | 0.212   | 0.64    | 0.02 | 3.53  | 0.001 **                      | 0.08   | 0.01 | 0.51  | 0.615    |                               |  |  |  |  |
| police                        | 0.00   | 0.02 | 0.04  | 0.968    | -0.31                         | 0.04 | -3.53 | 0.001 ** | -0.34   | 0.04                          | -3.22 | 0.002 ** | -0.11      | 0.01 | -1.02                         | 0.312   | -0.27   | 0.00 | -2.38 | 0.022 *                       | 0.07   | 0.00 | 0.78  | 0.439    |                               |  |  |  |  |
| Ambulance/fire                | -0.41  | 0.01 | -1.32 | 0.194    | 0.11                          | 0.04 | 0.23  | 0.817    | 0.39    | 0.03                          | 0.88  | 0.386    | -0.24      | 0.01 | -0.74                         | 0.463   | -0.67   | 0.00 | -1.98 | 0.054                         | 0.01   | 0.00 | 0.03  | 0.978    |                               |  |  |  |  |
| Welfare                       | -0.14  | 0.02 | -2.36 | 0.023 *  | 0.00                          | 0.08 | -0.04 | 0.965    | -0.22   | 0.11                          | -1.71 | 0.094    | -0.14      | 0.04 | -1.10                         | 0.277   | 0.01    | 0.02 | 0.08  | 0.937                         | 0.03   | 0.01 | 0.26  | 0.795    |                               |  |  |  |  |
| Education                     | 0.00   | 0.05 | -0.09 | 0.930    | -0.01                         | 0.18 | -0.30 | 0.768    | -0.02   | 0.16                          | -0.41 | 0.685    | -0.03      | 0.05 | -0.60                         | 0.550   | 0.01    | 0.02 | 0.18  | 0.858                         | 0.08   | 0.02 | 1.04  | 0.303    |                               |  |  |  |  |
| (VC=0.472, X²=241.21, p<0.01) |        |      |       |          | (VC=6.944, X²=654.93, p<0.01) |      |       |          |         | (VC=1.605, X²=240.02, p<0.01) |       |          |            |      | (VC=0.309, X²=236.39, p<0.01) |         |         |      |       | (VC=0.023, X²=115.92, p<0.01) |        |      |       |          | (VC=0.012, X²=125.75, p<0.01) |  |  |  |  |
| Model-2                       |        |      |       |          |                               |      |       |          |         |                               |       |          |            |      |                               |         |         |      |       |                               |        |      |       |          |                               |  |  |  |  |
| public health                 | 0.03   | 0.02 | 1.05  | 0.298    | -0.03                         | 0.09 | -0.67 | 0.509    | -0.11   | 0.07                          | -3.02 | 0.004 ** | -0.01      | 0.02 | -0.18                         | 0.859   | -0.02   | 0.02 | -0.28 | 0.782                         | 0.04   | 0.01 | 0.60  | 0.549    |                               |  |  |  |  |
| public works                  | 0.10   | 0.03 | 1.19  | 0.243    | 0.04                          | 0.15 | 0.32  | 0.751    | -0.05   | 0.22                          | -0.23 | 0.823    | 0.09       | 0.06 | 0.52                          | 0.606   | -0.12   | 0.01 | -1.10 | 0.276                         | 0.03   | 0.01 | 0.27  | 0.787    |                               |  |  |  |  |
| police                        | -0.25  | 0.84 | -1.02 | 0.312    | -0.07                         | 1.84 | -0.35 | 0.726    | 0.50    | 1.60                          | 2.50  | 0.017 *  | -0.16      | 0.60 | -0.72                         | 0.478   | -0.07   | 0.27 | -0.27 | 0.792                         | -0.03  | 0.17 | -0.11 | 0.910    |                               |  |  |  |  |
| Ambulance/fire                | -0.50  | 0.22 | -5.70 | 0.000 ** | -0.43                         | 0.54 | -5.30 | 0.000 ** | -0.83   | 0.68                          | -7.03 | 0.000 ** | -0.15      | 0.15 | -1.92                         | 0.061   | -0.20   | 0.06 | -2.50 | 0.016 *                       | 0.02   | 0.04 | 0.26  | 0.794    |                               |  |  |  |  |
| Welfare                       | -0.11  | 0.02 | -1.77 | 0.083    | -0.14                         | 0.09 | -1.12 | 0.271    | -0.45   | 0.13                          | -2.19 | 0.034 *  | -0.12      | 0.02 | -1.60                         | 0.117   | -0.12   | 0.01 | -1.43 | 0.161                         | -0.08  | 0.00 | -1.13 | 0.265    |                               |  |  |  |  |
| Education                     | -0.78  | 0.18 | -3.12 | 0.003 ** | -0.88                         | 0.44 | -3.91 | 0.000 ** | -0.77   | 0.31                          | -4.24 | 0.000 ** | -0.68      | 0.18 | -2.15                         | 0.038 * | -0.50   | 0.04 | -2.47 | 0.018 *                       | -0.12  | 0.03 | -0.58 | 0.564    |                               |  |  |  |  |
| (VC=0.504, X²=250.65, p<0.01) |        |      |       |          | (VC=6.469, X²=494.38, p<0.01) |      |       |          |         | (VC=1.404, X²=159.93, p<0.01) |       |          |            |      | (VC=0.418, X²=285.93, p<0.01) |         |         |      |       | (VC=0.019, X²=100.72, p<0.01) |        |      |       |          | (VC=0.014, X²=138.53, p<0.01) |  |  |  |  |
| Model-3                       |        |      |       |          |                               |      |       |          |         |                               |       |          |            |      |                               |         |         |      |       |                               |        |      |       |          |                               |  |  |  |  |
| public health                 | 0.02   | 0.02 | 0.77  | 0.448    | -0.03                         | 0.09 | -0.75 | 0.458    | -0.10   | 0.08                          | -2.58 | 0.014 *  | -0.01      | 0.02 | -0.14                         | 0.888   | -0.02   | 0.02 | -0.39 | 0.696                         | 0.03   | 0.01 | 0.53  | 0.598    |                               |  |  |  |  |
| public works                  | 0.07   | 0.03 | 1.01  | 0.319    | -0.01                         | 0.12 | -0.08 | 0.940    | -0.11   | 0.18                          | -0.60 | 0.553    | 0.04       | 0.05 | 0.28                          | 0.778   | -0.14   | 0.01 | -1.23 | 0.225                         | 0.05   | 0.01 | 0.32  | 0.749    |                               |  |  |  |  |
| police                        | -0.23  | 0.81 | -0.96 | 0.342    | -0.11                         | 1.82 | -0.57 | 0.573    | 0.46    | 1.50                          | 2.45  | 0.019 *  | -0.18      | 0.57 | -0.85                         | 0.403   | -0.03   | 0.30 | -0.12 | 0.909                         | 0.12   | 0.17 | 0.49  | 0.627    |                               |  |  |  |  |
| Ambulance/fire                | -0.53  | 0.24 | -5.45 | 0.000 ** | -0.42                         | 0.56 | -4.98 | 0.000 ** | -0.80   | 0.57                          | -8.09 | 0.000 ** | -0.13      | 0.19 | -1.27                         | 0.213   | -0.14   | 0.09 | -1.16 | 0.255                         | 0.02   | 0.05 | 0.23  | 0.822    |                               |  |  |  |  |
| Welfare                       | -0.09  | 0.02 | -1.64 | 0.111    | -0.11                         | 0.08 | -1.02 | 0.315    | -0.38   | 0.11                          | -2.21 | 0.034 *  | -0.08      | 0.01 | -1.34                         | 0.190   | -0.11   | 0.01 | -1.32 | 0.197                         | -0.12  | 0.00 | -2.04 | 0.049 *  |                               |  |  |  |  |
| (Education)                   |        |      |       |          |                               |      |       |          |         |                               |       |          |            |      |                               |         |         |      |       |                               |        |      |       |          |                               |  |  |  |  |
| Social                        | -0.01  | 0.25 | -0.23 | 0.817    | -0.15                         | 0.71 | -2.29 | 0.028 *  | -0.14   | 0.67                          | -1.99 | 0.054    | -0.04      | 0.33 | -0.43                         | 0.672   | -0.22   | 0.15 | -1.73 | 0.092                         | -0.17  | 0.05 | -2.52 | 0.016 *  |                               |  |  |  |  |
| Elementary                    | -0.15  | 0.02 | -0.91 | 0.370    | -0.27                         | 0.03 | -2.31 | 0.027 *  | -0.26   | 0.03                          | -2.14 | 0.040 *  | -0.11      | 0.01 | -0.66                         | 0.514   | -0.02   | 0.01 | -0.14 | 0.893                         | 0.16   | 0.00 | 1.01  | 0.318    |                               |  |  |  |  |
| Junior                        | -0.12  | 0.02 | -0.69 | 0.494    | -0.03                         | 0.05 | -0.24 | 0.814    | -0.06   | 0.04                          | -0.40 | 0.691    | -0.06      | 0.02 | -0.44                         | 0.660   | -0.05   | 0.01 | -0.27 | 0.787                         | 0.08   | 0.01 | 0.40  | 0.688    |                               |  |  |  |  |
| High                          | -0.04  | 0.01 | -0.39 | 0.698    | -0.02                         | 0.02 | -0.25 | 0.802    | 0.06    | 0.02                          | 0.66  | 0.511    | -0.07      | 0.01 | -0.82                         | 0.417   | -0.08   | 0.00 | -0.64 | 0.524                         | 0.04   | 0.00 | 0.32  | 0.754    |                               |  |  |  |  |
| Special                       | 0.02   | 0.00 | 0.20  | 0.843    | 0.17                          | 0.00 | 1.97  | 0.056    | 0.25    | 0.00                          | 2.76  | 0.009 ** | 0.18       | 0.00 | 1.51                          | 0.140   | 0.08    | 0.00 | 0.51  | 0.611                         | -0.20  | 0.00 | -2.32 | 0.026 *  |                               |  |  |  |  |
| Kindergarten                  | -0.41  | 0.01 | -3.74 | 0.001 ** | -0.45                         | 0.03 | -3.42 | 0.002 ** | -0.59   | 0.02                          | -5.78 | 0.000 ** | -0.39      | 0.01 | -2.60                         | 0.013 * | -0.17   | 0.00 | -1.51 | 0.139                         | -0.09  | 0.00 | -1.19 | 0.243    |                               |  |  |  |  |
| (VC=0.504, X²=253.52, p<0.01) |        |      |       |          | (VC=6.898, X²=563.23, p<0.01) |      |       |          |         | (VC=1.380, X²=177.02, p<0.01) |       |          |            |      | (VC=0.385, X²=275.66, p<0.01) |         |         |      |       | (VC=0.017, X²=97.36, p<0.01)  |        |      |       |          | (VC=0.012, X²=127.23, p<0.01) |  |  |  |  |
| Model-4                       |        |      |       |          |                               |      |       |          |         |                               |       |          |            |      |                               |         |         |      |       |                               |        |      |       |          |                               |  |  |  |  |
| public health                 | 0.02   | 0.05 | 0.44  | 0.666    | -0.01                         | 0.10 | -0.12 | 0.906    | -0.07   | 0.09                          | -1.65 | 0.109    | 0.03       | 0.02 | 0.95                          | 0.351   | -0.05   | 0.01 | -0.87 | 0.390                         | 0.06   | 0.01 | 1.12  | 0.269    |                               |  |  |  |  |
| public works                  | 0.08   | 0.03 | 1.06  | 0.296    | -0.02                         | 0.06 | -0.37 | 0.711    | -0.12   | 0.07                          | -1.79 | 0.083    | 0.06       | 0.05 | 0.41                          | 0.685   | -0.13   | 0.01 | -1.36 | 0.183                         | 0.07   | 0.01 | 0.53  | 0.602    |                               |  |  |  |  |
| police                        | -0.32  | 0.72 | -1.53 | 0.136    | -0.16                         | 1.53 | -0.99 | 0.331    | 0.35    | 1.54                          | 1.81  | 0.079    | -0.09      | 0.65 | -0.37                         | 0.715   | -0.25   | 0.30 | -0.84 | 0.410                         | 0.26   | 0.18 | 0.98  | 0.333    |                               |  |  |  |  |
| Ambulance/fire                | -0.34  | 0.25 | -3.27 | 0.002 ** | -0.18                         | 0.55 | -2.15 | 0.039 *  | -0.51   | 0.42                          | -7.05 | 0.000 ** | 0.02       | 0.20 | 0.24                          | 0.815   | 0.06    | 0.08 | 0.51  | 0.614                         | 0.16   | 0.05 | 1.57  | 0.126    |                               |  |  |  |  |
| (Education)                   |        |      |       |          |                               |      |       |          |         |                               |       |          |            |      |                               |         |         |      |       |                               |        |      |       |          |                               |  |  |  |  |
| Social                        | 0.07   | 0.31 | 0.91  | 0.368    | -0.03                         | 0.66 | -0.47 | 0.638    | 0.03    | 0.63                          | 0.48  | 0.633    | 0.06       | 0.26 | 0.69                          | 0.497   | -0.14   | 0.10 | -1.61 | 0.117                         | -0.06  | 0.05 | -0.92 | 0.364    |                               |  |  |  |  |
| Elementary                    | -0.08  | 0.01 | -0.85 | 0.402    | -0.16                         | 0.02 | -2.04 | 0.050 *  | -0.13   | 0.03                          | -1.16 | 0.256    | -0.06      | 0.01 | -0.37                         | 0.716   | 0.10    | 0.01 | 0.58  | 0.567                         | 0.21   | 0.00 | 1.36  | 0.183    |                               |  |  |  |  |
| Junior                        | -0.11  | 0.02 | -0.94 | 0.353    | 0.03                          | 0.03 | 0.32  | 0.753    | -0.07   | 0.03                          | -0.72 | 0.477    | 0.01       | 0.01 | 0.07                          | 0.944   | -0.05   | 0.01 | -0.28 | 0.782                         | 0.09   | 0.01 | 0.48  | 0.632    |                               |  |  |  |  |
| High                          | -0.03  | 0.01 | -0.35 | 0.732    | 0.05                          | 0.02 | 0.71  | 0.485    | 0.09    | 0.01                          | 1.51  | 0.141    | 0.00       | 0.01 | -0.02                         | 0.986   | -0.08   | 0.00 | -0.73 | 0.473                         | 0.09   | 0.00 | 0.77  | 0.447    |                               |  |  |  |  |
| Special                       | 0.00   | 0.00 | -0.07 | 0.947    | 0.11                          | 0.00 | 1.93  | 0.063    | 0.14    | 0.00                          | 2.22  | 0.033 *  | 0.13       | 0.00 | 1.23                          | 0.226   | 0.03    | 0.00 | 0.23  | 0.823                         | -0.24  | 0.00 | -2.78 | 0.009 ** |                               |  |  |  |  |
| Kindergarten                  | -0.15  | 0.01 | -1.46 | 0.155    | -0.03                         | 0.02 | -0.37 | 0.712    | -0.09   | 0.01                          | -1.40 | 0.170    | -0.14      | 0.01 | -0.90                         | 0.376   | 0.17    | 0.00 | 1.75  | 0.089                         | -0.10  | 0.00 | -0.89 | 0.378    |                               |  |  |  |  |
| (Welfare)                     |        |      |       |          |                               |      |       |          |         |                               |       |          |            |      |                               |         |         |      |       |                               |        |      |       |          |                               |  |  |  |  |
| Social                        | -0.25  | 0.13 | -2.44 | 0.020 *  | -0.27                         | 0.26 | -3.66 | 0.001 ** | -0.37   | 0.27                          | -4.29 | 0.000 ** | -0.32      | 0.14 | -2.37                         | 0.024 * | 0.02    | 0.05 | 0.12  | 0.901                         | -0.35  | 0.03 | -2.93 | 0.006 ** |                               |  |  |  |  |
| Elderly                       | 0.36   | 0.08 | 2.68  | 0.011 *  | 0.21                          | 0.15 | 2.27  | 0.030 *  | 0.37    | 0.15                          | 3.69  | 0.001 ** | -0.02      | 0.07 | -0.15                         | 0.880   | 0.62    | 0.04 | 3.10  | 0.004 **                      | 0.06   | 0.02 | 0.41  | 0.682    |                               |  |  |  |  |
| Children                      | -0.03  | 0.02 | -0.38 | 0.707    | -0.29                         | 0.03 | -4.56 | 0.000 ** | -0.40   | 0.03                          | -5.43 | 0.000 ** | -0.09      | 0.02 | -0.81                         | 0.424   | -0.26   | 0.01 | -2.53 | 0.016 *                       | 0.06   | 0.00 | 0.89  | 0.380    |                               |  |  |  |  |
| Livelihood                    | 0.04   | 0.01 | 0.36  | 0.718    | 0.00                          | 0.03 | -0.01 | 0.989    | 0.08    | 0.03                          | 0.71  | 0.483    | -0.21      | 0.01 | -1.38                         | 0.177   | -0.03   | 0.01 | -0.16 | 0.874                         | -0.13  | 0.00 | -1.04 | 0.307    |                               |  |  |  |  |
| (VC=0.478, X²=254.86, p<0.01) |        |      |       |          | (VC=8.111, X²=800.89, p<0.01) |      |       |          |         | (VC=2.438, X²=268.49, p<0.01) |       |          |            |      | (VC=0.320, X²=248.06, p<0.01) |         |         |      |       | (VC=0.017, X²=100.47, p<0.01) |        |      |       |          | (VC=0.006, X²=90.76, p<0.01)  |  |  |  |  |

β: coefficient value, SE: standard error, VC: variance component,  $\chi^2$ : Chi-square value.

\*p<0.05 and \*\*p<0.01 by hierarchal linear regression model analysis.

**Supplementary Table S4:**  
Impacts of financial expenditure ratio (Model-1) and per Capita (Model-2,3,4) of divisions and subdivisions of prefectures and municipalities on suicide mortality of female caused by major six motives.

| Factors                       | Family |      |       |          | Health                        |      |       |          | Economy |                               |       |          | Employment |      |                              |          | Romance |      |       |                              | School |      |       |       |                              |  |  |  |  |
|-------------------------------|--------|------|-------|----------|-------------------------------|------|-------|----------|---------|-------------------------------|-------|----------|------------|------|------------------------------|----------|---------|------|-------|------------------------------|--------|------|-------|-------|------------------------------|--|--|--|--|
|                               | β      | SE   | T     | p        | β                             | SE   | T     | p        | β       | SE                            | T     | p        | β          | SE   | T                            | p        | β       | SE   | T     | p                            | β      | SE   | T     | p     |                              |  |  |  |  |
| Model-1                       |        |      |       |          |                               |      |       |          |         |                               |       |          |            |      |                              |          |         |      |       |                              |        |      |       |       |                              |  |  |  |  |
| public health                 | -0.47  | 0.09 | -3.61 | 0.001 ** | -0.57                         | 0.18 | -6.45 | 0.000 ** | -0.48   | 0.04                          | -4.29 | 0.000 ** | -0.06      | 0.03 | -0.48                        | 0.634    | -0.25   | 0.02 | -2.51 | 0.016 *                      | -0.13  | 0.01 | -1.29 | 0.205 |                              |  |  |  |  |
| public works                  | 0.24   | 0.04 | 1.47  | 0.150    | 0.55                          | 0.10 | 3.99  | 0.000 ** | 0.36    | 0.02                          | 2.21  | 0.033 *  | 0.22       | 0.01 | 1.17                         | 0.248    | 0.42    | 0.01 | 2.85  | 0.007 **                     | 0.10   | 0.01 | 0.57  | 0.574 |                              |  |  |  |  |
| police                        | 0.06   | 0.01 | 0.57  | 0.572    | -0.18                         | 0.02 | -2.57 | 0.014 *  | -0.15   | 0.01                          | -1.33 | 0.190    | 0.10       | 0.00 | 0.79                         | 0.434    | -0.18   | 0.00 | -1.59 | 0.119                        | 0.08   | 0.00 | 0.90  | 0.373 |                              |  |  |  |  |
| Ambulance/fire                | -0.27  | 0.01 | -0.72 | 0.477    | -0.27                         | 0.01 | -0.91 | 0.370    | 0.38    | 0.00                          | 1.06  | 0.296    | -0.24      | 0.00 | -0.57                        | 0.571    | -0.03   | 0.00 | -0.10 | 0.918                        | 0.17   | 0.00 | 0.35  | 0.725 |                              |  |  |  |  |
| Welfare                       | -0.03  | 0.01 | -0.37 | 0.717    | 0.04                          | 0.04 | 0.54  | 0.592    | 0.05    | 0.01                          | 0.46  | 0.644    | -0.10      | 0.01 | -0.79                        | 0.436    | 0.08    | 0.01 | 0.97  | 0.340                        | 0.03   | 0.00 | 0.31  | 0.759 |                              |  |  |  |  |
| Education                     | 0.13   | 0.06 | 1.60  | 0.118    | 0.05                          | 0.12 | 1.07  | 0.291    | 0.10    | 0.03                          | 1.76  | 0.085    | 0.13       | 0.02 | 1.86                         | 0.070    | 0.08    | 0.02 | 1.45  | 0.156                        | 0.01   | 0.01 | 0.23  | 0.816 |                              |  |  |  |  |
| (VC=0.120, X²=179.14, p<0.01) |        |      |       |          | (VC=2.126, X²=483.39, p<0.01) |      |       |          |         | (VC=0.016, X²=101.78, p<0.01) |       |          |            |      | (VC=0.002, X²=66.38, p<0.05) |          |         |      |       | (VC=0.008, X²=95.73, p<0.01) |        |      |       |       | (VC=0.000, X²=45.02, p>0.05) |  |  |  |  |
| Model-2                       |        |      |       |          |                               |      |       |          |         |                               |       |          |            |      |                              |          |         |      |       |                              |        |      |       |       |                              |  |  |  |  |
| public health                 | 0.20   | 0.03 | 3.40  | 0.001 ** | 0.04                          | 0.05 | 1.17  | 0.250    | 0.03    | 0.01                          | 1.01  | 0.320    | 0.12       | 0.00 | 4.38                         | 0.000 ** | 0.01    | 0.01 | 0.16  | 0.876                        | -0.01  | 0.00 | -0.31 | 0.758 |                              |  |  |  |  |
| public works                  | 0.16   | 0.02 | 2.35  | 0.024 *  | 0.06                          | 0.11 | 0.36  | 0.718    | 0.00    | 0.02                          | 0.03  | 0.980    | -0.12      | 0.00 | -1.95                        | 0.058    | -0.01   | 0.01 | -0.10 | 0.924                        | -0.10  | 0.00 | -0.92 | 0.363 |                              |  |  |  |  |
| police                        | -0.58  | 0.39 | -2.72 | 0.010 *  | -0.41                         | 1.17 | -2.03 | 0.049 *  | 0.36    | 0.31                          | 1.17  | 0.248    | -0.35      | 0.16 | -1.22                        | 0.231    | -0.24   | 0.19 | -0.85 | 0.402                        | -0.01  | 0.10 | -0.04 | 0.968 |                              |  |  |  |  |
| Ambulance/fire                | -0.44  | 0.17 | -3.33 | 0.002 ** | -0.60                         | 0.56 | -4.44 | 0.000 ** | -0.52   | 0.09                          | -4.37 | 0.000 ** | -0.12      | 0.05 | -0.93                        | 0.356    | -0.26   | 0.06 | -2.21 | 0.033 *                      | -0.06  | 0.03 | -0.49 | 0.625 |                              |  |  |  |  |
| Welfare                       | -0.05  | 0.01 | -0.70 | 0.489    | -0.13                         | 0.07 | -0.88 | 0.383    | -0.23   | 0.01                          | -1.75 | 0.088    | -0.12      | 0.00 | -2.31                        | 0.026 *  | -0.13   | 0.00 | -1.48 | 0.145                        | -0.02  | 0.00 | -0.50 | 0.617 |                              |  |  |  |  |
| Education                     | -0.44  | 0.07 | -2.37 | 0.023 *  | -0.74                         | 0.19 | -4.70 | 0.000 *  | -0.38   | 0.04                          | -2.06 | 0.046 *  | 0.11       | 0.03 | 0.46                         | 0.648    | -0.51   | 0.02 | -3.26 | 0.002 **                     | -0.17  | 0.01 | -0.91 | 0.367 |                              |  |  |  |  |
| (VC=0.137, X²=195.92, p<0.01) |        |      |       |          | (VC=2.200, X²=392.98, p<0.01) |      |       |          |         | (VC=0.017, X²=95.68, p<0.01)  |       |          |            |      | (VC=0.003, X²=73.24, p<0.01) |          |         |      |       | (VC=0.006, X²=81.21, p<0.01) |        |      |       |       | (VC=0.000, X²=43.19, p>0.05) |  |  |  |  |
| Model-3                       |        |      |       |          |                               |      |       |          |         |                               |       |          |            |      |                              |          |         |      |       |                              |        |      |       |       |                              |  |  |  |  |
| public health                 | 0.20   | 0.03 | 3.33  | 0.002 ** | 0.04                          | 0.05 | 1.14  | 0.260    | 0.03    | 0.01                          | 0.90  | 0.372    | 0.12       | 0.01 | 1.64                         | 0.109    | 0.00    | 0.01 | -0.03 | 0.974                        | -0.01  | 0.00 | -0.26 | 0.798 |                              |  |  |  |  |
| public works                  | 0.15   | 0.02 | 1.91  | 0.064    | 0.02                          | 0.09 | 0.13  | 0.896    | -0.05   | 0.02                          | -0.30 | 0.764    | -0.12      | 0.01 | -1.26                        | 0.216    | -0.04   | 0.01 | -0.36 | 0.721                        | -0.12  | 0.01 | -1.11 | 0.272 |                              |  |  |  |  |
| police                        | -0.50  | 0.43 | -2.12 | 0.041 *  | -0.39                         | 1.08 | -2.06 | 0.047 *  | 0.33    | 0.29                          | 1.18  | 0.245    | -0.29      | 0.16 | -1.04                        | 0.305    | -0.29   | 0.19 | -1.05 | 0.300                        | -0.11  | 0.12 | -0.33 | 0.741 |                              |  |  |  |  |
| Ambulance/fire                | -0.40  | 0.15 | -3.53 | 0.001 ** | -0.59                         | 0.45 | -5.40 | 0.000 ** | -0.45   | 0.09                          | -3.66 | 0.001 ** | -0.08      | 0.05 | -0.60                        | 0.555    | -0.25   | 0.06 | -2.09 | 0.044 *                      | -0.06  | 0.03 | -0.51 | 0.614 |                              |  |  |  |  |
| Welfare                       | -0.04  | 0.01 | -0.59 | 0.558    | -0.09                         | 0.05 | -0.81 | 0.422    | -0.16   | 0.01                          | -1.64 | 0.109    | -0.10      | 0.00 | -1.24                        | 0.222    | -0.13   | 0.00 | -1.71 | 0.095                        | -0.03  | 0.00 | -0.80 | 0.430 |                              |  |  |  |  |
| (Education)                   |        |      |       |          |                               |      |       |          |         |                               |       |          |            |      |                              |          |         |      |       |                              |        |      |       |       |                              |  |  |  |  |
| Social                        | -0.09  | 0.18 | -1.04 | 0.305    | -0.15                         | 0.61 | -1.63 | 0.111    | -0.19   | 0.14                          | -1.55 | 0.130    | 0.00       | 0.07 | -0.04                        | 0.965    | -0.23   | 0.07 | -2.53 | 0.016 *                      | -0.07  | 0.06 | -0.55 | 0.582 |                              |  |  |  |  |
| Elementary                    | -0.21  | 0.01 | -1.85 | 0.073    | -0.25                         | 0.02 | -2.29 | 0.028 *  | -0.08   | 0.00                          | -0.57 | 0.570    | 0.10       | 0.00 | 0.76                         | 0.453    | -0.17   | 0.00 | -1.27 | 0.211                        | -0.03  | 0.00 | -0.21 | 0.836 |                              |  |  |  |  |
| Junior                        | 0.23   | 0.01 | 1.72  | 0.094    | 0.07                          | 0.03 | 0.54  | 0.596    | -0.16   | 0.00                          | -1.39 | 0.174    | -0.11      | 0.00 | -0.71                        | 0.485    | 0.01    | 0.00 | 0.03  | 0.975                        | 0.07   | 0.00 | 0.50  | 0.621 |                              |  |  |  |  |
| High                          | -0.12  | 0.00 | -1.33 | 0.192    | 0.02                          | 0.01 | 0.22  | 0.830    | 0.12    | 0.00                          | 1.51  | 0.141    | 0.00       | 0.00 | -0.04                        | 0.970    | 0.06    | 0.00 | 0.54  | 0.592                        | 0.02   | 0.00 | 0.23  | 0.821 |                              |  |  |  |  |
| Special                       | 0.03   | 0.00 | 0.40  | 0.694    | 0.12                          | 0.00 | 1.40  | 0.170    | 0.26    | 0.00                          | 2.84  | 0.007 ** | 0.02       | 0.00 | 0.26                         | 0.799    | 0.05    | 0.00 | 0.40  | 0.689                        | 0.10   | 0.00 | 1.08  | 0.286 |                              |  |  |  |  |
| Kindergarten                  | -0.24  | 0.00 | -2.22 | 0.033 *  | -0.51                         | 0.02 | -3.59 | 0.001 ** | -0.44   | 0.00                          | -4.49 | 0.000 ** | -0.04      | 0.00 | -0.30                        | 0.765    | -0.17   | 0.00 | -1.54 | 0.133                        | -0.01  | 0.00 | -0.10 | 0.925 |                              |  |  |  |  |
| (VC=0.125, X²=187.32, p<0.01) |        |      |       |          | (VC=2.155, X²=420.89, p<0.01) |      |       |          |         | (VC=0.013, X²=89.04, p<0.01)  |       |          |            |      | (VC=0.003, X²=68.39, p<0.01) |          |         |      |       | (VC=0.003, X²=63.96, p<0.01) |        |      |       |       | (VC=0.000, X²=39.00, p>0.05) |  |  |  |  |
| Model-4                       |        |      |       |          |                               |      |       |          |         |                               |       |          |            |      |                              |          |         |      |       |                              |        |      |       |       |                              |  |  |  |  |
| public health                 | 0.18   | 0.03 | 3.11  | 0.004 ** | 0.06                          | 0.04 | 1.97  | 0.057    | 0.05    | 0.01                          | 1.10  | 0.281    | 0.04       | 0.01 | 0.82                         | 0.417    | 0.01    | 0.01 | 0.34  | 0.733                        | -0.02  | 0.00 | -0.76 | 0.453 |                              |  |  |  |  |
| public works                  | 0.13   | 0.02 | 1.86  | 0.072    | 0.03                          | 0.07 | 0.30  | 0.767    | -0.05   | 0.01                          | -0.52 | 0.607    | -0.11      | 0.00 | -1.59                        | 0.121    | -0.03   | 0.01 | -0.31 | 0.758                        | -0.14  | 0.01 | -1.14 | 0.264 |                              |  |  |  |  |
| police                        | -0.05  | 0.18 | -0.50 | 0.623    | -0.38                         | 0.99 | -2.16 | 0.038 *  | 0.23    | 0.29                          | 0.79  | 0.433    | -0.35      | 0.17 | -1.18                        | 0.248    | -0.34   | 0.18 | -1.29 | 0.205                        | -0.24  | 0.11 | -0.83 | 0.415 |                              |  |  |  |  |
| Ambulance/fire                | -0.18  | 0.12 | -2.06 | 0.047 *  | -0.29                         | 0.34 | -3.52 | 0.001 ** | -0.23   | 0.11                          | -1.55 | 0.130    | -0.06      | 0.05 | -0.45                        | 0.657    | -0.07   | 0.07 | -0.46 | 0.649                        | 0.00   | 0.03 | 0.01  | 0.989 |                              |  |  |  |  |
| (Education)                   |        |      |       |          |                               |      |       |          |         |                               |       |          |            |      |                              |          |         |      |       |                              |        |      |       |       |                              |  |  |  |  |
| Social                        | 0.00   | 0.15 | -0.02 | 0.981    | 0.00                          | 0.38 | 0.08  | 0.936    | -0.07   | 0.10                          | -0.89 | 0.382    | 0.00       | 0.06 | 0.02                         | 0.986    | -0.13   | 0.06 | -1.76 | 0.088                        | -0.07  | 0.06 | -0.54 | 0.590 |                              |  |  |  |  |
| Elementary                    | -0.07  | 0.01 | -0.75 | 0.459    | -0.15                         | 0.02 | -1.36 | 0.182    | 0.01    | 0.00                          | 0.08  | 0.935    | 0.11       | 0.00 | 0.94                         | 0.354    | -0.08   | 0.00 | -0.57 | 0.571                        | -0.02  | 0.00 | -0.16 | 0.871 |                              |  |  |  |  |
| Junior                        | 0.13   | 0.01 | 1.17  | 0.251    | 0.17                          | 0.03 | 1.47  | 0.151    | -0.15   | 0.00                          | -1.23 | 0.227    | -0.17      | 0.00 | -0.94                        | 0.356    | 0.04    | 0.00 | 0.24  | 0.816                        | 0.01   | 0.00 | 0.09  | 0.926 |                              |  |  |  |  |
| High                          | -0.10  | 0.00 | -1.34 | 0.188    | 0.10                          | 0.01 | 1.43  | 0.161    | 0.15    | 0.00                          | 1.86  | 0.072    | -0.04      | 0.00 | -0.44                        | 0.661    | 0.10    | 0.00 | 0.93  | 0.361                        | -0.02  | 0.00 | -0.17 | 0.863 |                              |  |  |  |  |
| Special                       | -0.03  | 0.00 | -0.50 | 0.619    | 0.04                          | 0.00 | 0.52  | 0.609    | 0.22    | 0.00                          | 2.71  | 0.011 *  | 0.03       | 0.00 | 0.32                         | 0.748    | 0.00    | 0.00 | 0.01  | 0.994                        | 0.12   | 0.00 | 1.31  | 0.198 |                              |  |  |  |  |
| Kindergarten                  | -0.02  | 0.00 | -0.28 | 0.778    | -0.06                         | 0.02 | -0.42 | 0.675    | -0.08   | 0.00                          | -0.69 | 0.496    | -0.04      | 0.00 | -0.19                        | 0.849    | 0.15    | 0.00 | 1.14  | 0.263                        | 0.02   | 0.00 | 0.11  | 0.914 |                              |  |  |  |  |
| (Welfare)                     |        |      |       |          |                               |      |       |          |         |                               |       |          |            |      |                              |          |         |      |       |                              |        |      |       |       |                              |  |  |  |  |
| Social                        | -0.32  | 0.06 | -3.81 | 0.001 ** | -0.44                         | 0.16 | -6.21 | 0.000 ** | -0.28   | 0.04                          | -3.07 | 0.004 ** | 0.00       | 0.03 | -0.03                        | 0.974    | -0.20   | 0.04 | -1.54 | 0.132                        | -0.05  | 0.02 | -0.44 | 0.666 |                              |  |  |  |  |
| Elderly                       | 0.18   | 0.03 | 2.10  | 0.044 *  | 0.25                          | 0.10 | 2.57  | 0.015 *  | 0.35    | 0.02                          | 3.86  | 0.001 ** | 0.23       | 0.02 | 1.22                         | 0.231    | 0.25    | 0.02 | 1.45  | 0.156                        | 0.27   | 0.01 | 1.30  | 0.201 |                              |  |  |  |  |
| Children                      | 0.02   | 0.01 | 0.26  | 0.794    | -0.16                         | 0.02 | -2.22 | 0.034 *  | -0.17   | 0.00                          | -1.99 | 0.055    | 0.05       | 0.00 | 0.62                         | 0.539    | -0.21   | 0.00 | -2.02 | 0.051                        | 0.07   | 0.00 | 0.91  | 0.368 |                              |  |  |  |  |
| Livelihood                    | -0.04  | 0.00 | -0.50 | 0.617    | -0.15                         | 0.02 | -1.21 | 0.236    | 0.05    | 0.00                          | 0.59  | 0.561    | -0.02      | 0.00 | -0.11                        | 0.913    | -0.10   | 0.00 | -0.60 | 0.551                        | 0.27   | 0.00 | 1.24  | 0.224 |                              |  |  |  |  |
| (VC=0.154, X²=222.44, p<0.01) |        |      |       |          | (VC=2.294, X²=551.16, p<0.01) |      |       |          |         | (VC=0.014, X²=94.57, p<0.01)  |       |          |            |      | (VC=0.002, X²=65.21, p<0.01) |          |         |      |       | (VC=0.002, X²=56.93, p<0.01) |        |      |       |       | (VC=0.000, X²=27.72, p>0.05) |  |  |  |  |
